1 Cobwebbing in the city: urbanization-driven changes in web-building are decoupled from  
2 body size in an orb-web spider

3 **Maxime Dahirel<sup>1,2\*</sup>, Maarten De Cock<sup>1</sup>, Pieter Vantieghem<sup>1</sup> and Dries Bonte<sup>1</sup>**

4 <sup>1</sup> Ghent University, Department of Biology, Terrestrial Ecology unit, K. L. Ledeganckstraat  
5 35, B-9000 Gent, Belgium

6 <sup>2</sup> Université de Rennes 1/ CNRS, UMR 6553 Ecobio, 263 avenue du Général Leclerc, F-  
7 35042 Rennes, France

8 \* corresponding author: [maxime.dahirel@yahoo.fr](mailto:maxime.dahirel@yahoo.fr)

9

## 10 Abstract

- 11 1. In animals, behavioural responses may play an important role in determining  
12 population persistence in the face of environmental changes. Body size is a key trait  
13 central to many life history traits and behaviours. While behaviours are typically  
14 assumed to be highly plastic, size correlations may impose constraints on their  
15 adaptive value when size itself is subject to environmental changes.
- 16 2. Urbanization is an important human-induced environmental change that imposes  
17 multiple selection pressures on both body size and (size-constrained) behaviour. How  
18 these combine to shape behavioural responses of urban-dwelling species is unclear.
- 19 3. Using web-building behaviour, an easily quantifiable behaviour linked to body size,  
20 and the garden spider *Araneus diadematus* as a model, we disentangle direct  
21 behavioural responses to urbanization and body size constraints across a network of 63  
22 selected populations differing in urbanization intensity at two spatial scales.
- 23 4. Spiders were smaller in highly urbanized sites (local scale only), in line with reduced  
24 prey availability and the urban heat island effect. The use of piecewise structural  
25 equation modelling reveals that despite existing size constraints on web-building  
26 behaviour, these size shifts overall have a minor effect on web-building response to  
27 urbanization. Spiders altered their web-building behaviours in response to  
28 urbanization in ways that are expected to compensate, at least in part, for reduced prey  
29 availability. Different components of web-building reacted to urbanization at different  
30 scales, which may indicate different balances between the effects of genetic adaptation  
31 and plasticity. Although fecundity decreased with local-scale urbanization, *Araneus*  
32 *diadematus* abundance stayed remarkably stable across urbanization gradients,  
33 independently of scale and intensity, meaning this strategy appears overall successful  
34 at the population level.

35        5. Our results demonstrate that responses in typically size-dependent behaviours may be  
36            decoupled from size-correlations, thereby allowing fitness maximisation in novel  
37            environments.

38    **Key words:** adaptation, confirmatory path analysis, fecundity, foraging behaviour, spider  
39    web, temperature-size rule

40

## 41 **Introduction**

42 In animals, behaviour is often considered as the first route to adaptation to rapid  
43 environmental changes (Wong & Candolin 2015). Numerous examples of both adaptive and  
44 maladaptive behavioural changes in response to e.g. human-induced environmental changes  
45 have now been recorded, from changes in personality to alterations of movement and  
46 foraging patterns (Lowry, Lill & Wong 2013). The potential costs and constraints associated  
47 with these behavioural changes are, however, poorly understood. Behaviours may be linked to  
48 metabolic and physiological processes that directly impact fitness (Bonte *et al.* 2012;  
49 Debecker *et al.* 2016). When behaviour is correlated to other traits, conflicting selection  
50 pressures may hinder adaptation, leading to mismatches between the expressed and optimal  
51 behaviours in the new environment (Wong & Candolin 2015). In particular, many behaviours  
52 are correlated to body size (e.g. Stevens *et al.* 2014; Gregorič, Kuntner & Blackledge 2015), a  
53 key trait that can itself be directly impacted by environmental changes (Oliveira *et al.* 2016;  
54 Renauld *et al.* 2016). Increases in temperature, for instance, are expected to lead to reduced  
55 body size in ectotherms, in relation to increased metabolic rates (Sheridan & Bickford 2011;  
56 Horne, Hirst & Atkinson 2015); when success is body size-dependent, this might shape the  
57 optimality of body-size dependent behaviours in the new environment.

58 Urbanization is one of the most prominent human-induced environmental changes, with cities  
59 now harbouring more than half of the global human population (Seto, Güneralp & Hutyrá  
60 2012; United Nations Population Division 2015). Direct and indirect impacts of the  
61 urbanization process include habitat fragmentation, increased temperatures (the “Urban Heat  
62 Island” effect), elevated levels of pollution and changes in resource availability due to the  
63 decline of key species and/or the increased availability of anthropogenic food sources (Alberti  
64 2015; Parris 2016). This combination of changes means cities present novel ecological  
65 conditions never encountered before in organisms’ evolutionary histories (Alberti 2015;

66 Hendry, Gotanda & Svensson 2017; Johnson & Munshi-South 2017), driving changes in  
67 community taxonomic and functional composition (Dahirel *et al.* 2017; Piano *et al.* 2017) as  
68 well as intraspecific phenotypic changes (Lowry *et al.* 2013; Brans *et al.* 2017b; Alberti *et al.*  
69 2017a; Alberti, Marzluff & Hunt 2017b; Johnson & Munshi-South 2017). Rates of phenotypic  
70 change in cities are even often higher than those observed in more natural or other  
71 anthropogenic environments (Alberti *et al.* 2017a), making cities key “natural experiments” in  
72 evolutionary ecology (Johnson & Munshi-South 2017).

73 Orb web spiders (Araneae, Araneidae) are a unique model for the study of foraging  
74 behaviour, due to their trap-building strategy (Foelix 2010). Indeed, detailed quantification of  
75 the orb web structure allows inferences on both the implemented foraging strategies (from  
76 web architecture) and the energetic investments in web production (from the amount of  
77 produced silk) (Sherman 1994). Web building is additionally coupled to body size both within  
78 and among species, with larger spiders on average producing larger, and often less densely  
79 structured webs (Gregorič *et al.* 2015). By relating web-building behaviour, individual size  
80 and fecundity, it is then possible to understand how changes in environmental conditions  
81 directly, but also indirectly affect the adaptive value of these behavioural changes.

82 We here study and quantify shifts in body size and web building in response to urbanization,  
83 using piecewise structural equation models in order to disentangle the relative contribution of  
84 size constraints to (adaptive) behavioural changes. We used the garden spider *Araneus*  
85 *diadematus* as a model; this species is considered as a “winner” in relation to urbanization,  
86 and dominates urban and non-urban orb web spider communities in western Europe (e.g.  
87 Dahirel *et al.* 2017). *A. diadematus* alters its web-building behaviour depending on abiotic  
88 conditions and the availability/ characteristics of potential prey (Vollrath, Downes &  
89 Krackow 1997; Schneider & Vollrath 1998; Bonte *et al.* 2008); webs are recycled and rebuilt  
90 daily, allowing spiders to match currently/recently experienced environmental conditions

91 (Breed *et al.* 1964). As cities harbour smaller prey (Dahirel *et al.* 2017), we expected *Araneus*  
92 *diadematus* to present adaptive shifts in web-building behaviour in response to urbanization,  
93 despite reduced size (due to the Urban Heat Island effect) and body size-related constraints  
94 leading to reduced web production in cities. We studied urbanization at two independent  
95 spatial scales, as environmental correlates of urbanization are scale-dependent (McDonnell &  
96 Hahs 2015; Kaiser, Merckx & Van Dyck 2016), and contrasting responses between scales  
97 may also yield insights on the relative balance between plasticity and genetic adaptation  
98 (Richardson *et al.* 2014). We additionally analyse spider abundance and fecundity data to  
99 investigate potential fitness costs of adaptation to city life.

100

## 101 **Material and Methods**

### 102 Study species

103 *Araneus diadematus* Clerck 1757 is a common orb-weaving spider present across the  
104 Holarctic in a wide range of natural and human-altered environments (Lee & Thomas 2002;  
105 Nentwig *et al.* 2016). Its distinctive dorsal cross pattern makes field identification easy  
106 (Roberts 1993). Females usually become mature in late summer, and can survive through to  
107 late autumn (Lee & Thomas 2002). In cities, *Araneus diadematus* appears to mostly settle in  
108 gardens and greenspots, as opposed to roadsides or close to buildings (Van Keer *et al.* 2010).

109

### 110 Study sites

111 We sampled 63 *A. diadematus* populations across a well-studied network of urban, rural and  
112 natural landscapes in northern Belgium, one of the most urbanized and densely populated  
113 regions in Europe (Supplementary Figure S1)(United Nations Population Division 2015; see  
114 Kaiser *et al.* 2016; Dahirel *et al.* 2017; or Brans *et al.* 2017a for detailed descriptions of this  
115 network). Urbanization was studied at two different spatial scales thanks to a 2-step stratified  
116 selection design, using the percentage of surfaces occupied by buildings as a proxy for  
117 urbanization (extracted from the Large-scale Reference Database, a reference map of  
118 Flanders; <https://www.agiv.be/international/en/products/grb-en>). First, 21 non-overlapping  
119 plots (3 × 3 km, hereafter “landscape scale”) were selected, sorted into three urbanization  
120 levels (7 plots by level). High-urbanization landscapes had more than 10% of their area  
121 covered by buildings (to the exclusion of roads and parking lots). Low-urbanization  
122 landscapes had less than 3% of their surfaces occupied by buildings and more than 20% by  
123 so-called “ecologically valuable areas” (areas with rare, vulnerable or highly diverse  
124 vegetation; based on the Flanders Biological Valuation Map; Vriens *et al.* 2011). Finally,

125 “intermediate” landscapes had between 5 and 10% of their surface covered by buildings. We  
126 then chose within each landscape 3 sites (200 × 200 m, hereafter the “local scale”), one per  
127 urbanization level, this time based on building area only. Compared to low-urbanization sites,  
128 highly urbanized sites had higher human population density, as well as lower prey biomass  
129 availability due to on average smaller preys (at both landscape and local scales; Dahirel *et al.*  
130 2017), and higher average temperature, mostly at local scales (Kaiser *et al.* 2016).

131

### 132 Spider collection and phenotypic measurements

133 Populations were sampled from 25 August to 5 October 2014, i.e. during the first part of the  
134 reproductive period (Lee & Thomas 2002). One landscape (3 sites) was visited per day; there  
135 was no significant link between landscape-level urbanization and sampling date (ANOVA;  $N$   
136 = 21 landscapes,  $F_{2,18} = 0.009$ ,  $p = 0.991$ ). In each visited site, between 7 and 11 adult females  
137 per population ( $N_{total} = 621$ , average  $\pm$  SD :  $9.86 \pm 0.74$ ) were sampled on their webs and  
138 stored in 70% ethanol; spiders’ cephalothorax width was measured under binocular  
139 microscope and used as a proxy for body size (Bonte *et al.* 2008). Out of these 621 spiders,  
140 193 individuals caught in the 9 landscapes of the Ghent region were also dissected and the  
141 number of mature eggs recorded. Population density data (number of spiders observed per  
142 200 × 200 m site in 4.5 person-hours) were additionally available in the 62 sites (out of 63)  
143 sampled in the community-level study by Dahirel *et al.* (2017).

144 Based on measurements taken in the field (vertical and horizontal diameters of whole web and  
145 free central zone, number of sticky silk spirals in each web quadrant), we estimated three  
146 design parameters for the webs belonging to sampled spiders: the total length of the sticky  
147 capture spiral as a measure of silk investment (capture thread length, or CTL; following  
148 Venner *et al.* 2001), the web capture area surface (considering orb webs as ellipses, following



149 Herberstein & Tso 2000), and the mesh width (interval between sticky spirals, averaged over  
150 the horizontal and vertical axes). Mesh width can be used as an index of web-building  
151 strategy: for a given amount of silk, higher than average mesh widths should indicate spiders  
152 that choose to build relatively larger, but “looser” webs, while lower values indicate spiders  
153 that create smaller, but “denser” webs (Sherman 1994; Eberhard 2013). This is confirmed by  
154 our data, as capture area surface is almost perfectly predicted by the combination of CTL,  
155 mesh width and their interaction (linear model,  $R^2 = 0.998$ ,  $N = 621$ ).

156

## 157 Statistical analysis

158 All analyses were carried out using R, version 3.4 (R Core Team 2016).

159 The number of adult spiders per site was analysed using a Poisson generalized linear model.  
160 Spider numbers were modelled as a function of local and landscape level of urbanization, as  
161 well as sampling date; we additionally used distance-based Moran Eigenvector Maps  
162 (dbMEMs; Borcard, Gillet & Legendre 2011; Legendre & Legendre 2012) to account for  
163 spatial autocorrelation between sites.

164 To disentangle the indirect (through size changes) and direct effects of urbanization on web-  
165 building behaviour, we used piecewise Structural Equation Modelling (also known as path  
166 analysis), a type of models in which multiple predictors and response variables are united in a  
167 path diagram, with paths reflecting hypothesized causal relationships (Shipley 2009; Grace *et*  
168 *al.* 2012; Lefcheck 2016). Piecewise SEMs are built by translating the chosen path diagram  
169 into a set of (generalized) linear models, which can then be fitted individually using standard  
170 methods.

171 We compared four candidate path diagrams (Fig. 1a). A first “null” model contained no effect  
172 of urbanization and was the “skeleton” upon which the three others were built: it simply  
173 assumed that body size (approximated by cephalothorax width) could influence both CTL  
174 (Bonte *et al.* 2008) and mesh width (Gregorič *et al.* 2015). These traits could also be  
175 influenced by sampling date. Web surface was then explained by CTL, mesh width and their  
176 interaction.

177 Building from this starting model, we assumed (i) that urbanization level (both at local and  
178 landscape levels) could influence only body size, with shifts in web traits only being observed  
179 as a consequence of body size changes (the “indirect” model), (ii) that urbanization had no  
180 effect on size, but had a direct effect on mesh width and CTL, which then determined web  
181 surface (the “direct” model), or (iii) that both types of effects were present, and jointly shaped  
182 orb-web building (the “full” model). Each SEM was composed of four linear submodels used  
183 to model respectively body size, mesh width (web-building strategy), CTL (web investment)  
184 and web surface. In the first three submodels, we used distance-based Moran Eigenvector  
185 Maps to account for residual spatial autocorrelation among spiders, both within and between  
186 landscapes. There was no evidence of residual autocorrelation after the inclusion of dbMEMs  
187 (95% confidence intervals of spline correlograms overlapped with 0 at all distances and for all  
188 traits).

189 To assess the goodness of fit of each SEM, we used Shipley’s d-sep test (Shipley 2000). To  
190 summarize, a  $p$  value  $> 0.05$  associated with the Fisher’s  $C$  test statistic indicates that, *given*  
191 *the set of variables*, there are no missing paths that could significantly increase the  
192 explanatory power of the model if added. Fisher’s  $C$  can also be used to calculate AIC-like  
193 information criteria to compare competing SEMs (Shipley 2013). Continuous variables were  
194 scaled and centred; SEMs were fitted, evaluated and compared using the R package  
195 *piecewiseSEM* (Lefcheck 2016).

196 For comparison with direct effects parameter values, indirect effects of urbanization on web  
197 traits were obtained by multiplying relevant model coefficients across the causal network. 95  
198 % confidence intervals around these effects were obtained by resampling estimated parameter  
199 distributions 10000 times.

200 Then, we used a generalized linear model to analyse the effect of urbanization (local- and  
201 landscape-scale), body size, sampling date, web traits and web traits  $\times$  urbanization  
202 interactions on spider egg load. As in previous models, we used dbMEMs to account for  
203 spatial autocorrelation. We used a negative binomial GLM, instead of a Poisson GLM, due to  
204 evidence of overdispersion (dispersion test on the Poisson GLM, dispersion = 3.04,  $Z = 5.82$ ,  
205  $p = 2.89 \times 10^{-9}$ ). Similarly to above, we multiplied relevant coefficients from this fecundity  
206 model and from the path model to evaluate the direct and indirect effects of urbanization on  
207 egg counts.

208

## 209 **Results**

### 210 Spider population density

211 The number of spiders found per site was not significantly influenced by urbanization at  
212 either spatial scale (local scale:  $X^2 = 1.14$ ,  $df = 2$ ,  $p = 0.57$ ; landscape scale:  $X^2 = 3.07$ ,  $df = 2$ ,  
213  $p = 0.22$ ), or by spatial structure ( $X^2 = 5.2563$ ,  $df = 12$ ,  $p = 0.95$ ). There was also no temporal  
214 trend in spider abundance ( $X^2 = 0.20$ ,  $df = 1$ ,  $p = 0.66$ ). There were on average  $16.85 \pm 3.16$   
215 (SD) adult female *Araneus diadematus* found per 4ha site.

### 216 Path analysis of web traits shifts

217 Based on Fisher's  $C$  and AIC values, the best of the four candidate path models is the most  
218 complex, i.e. the model in which urbanization is assumed to affect spider web-building  
219 behaviour both directly and through its effects on body size (Table 1, Fig 1b).

220 Body size, as measured by cephalothorax width, was significantly influenced by the local  
221 level of urbanization (ANOVA,  $F_{2,603} = 18.16$ ,  $p = 2.20 \times 10^{-8}$ ), with spiders being smaller in  
222 highly urbanized sites compared to more natural and intermediate populations (by  $0.31 \pm 0.07$   
223 mm, Tukey HSD tests,  $p < 1.12 \times 10^{-5}$ , Fig 2); there was no clear effect of landscape-scale  
224 urbanization ( $F_{2,603} = 5.71$ ,  $p = 0.036$ ; but  $p > 0.05$  for all pairwise Tukey tests). Spiders were  
225 larger at later sampling dates ( $\beta \pm SE = 0.24 \pm 0.11$ ,  $F_{1,603} = 4.17$ ,  $p = 0.028$ ), and the use of  
226 dbMEMs revealed significant spatial autocorrelation in spider body size ( $F_{12,603} = 52.38$ ,  $p =$   
227  $0.028$ ).

228 Mesh width significantly increased with body size ( $\beta \pm SE = 0.30 \pm 0.04$ ,  $F_{1,602} = 47.95$ ,  $p =$   
229  $8.28 \times 10^{-15}$ ). Independently of size, spiders built webs with smaller mesh width in highly  
230 urbanized populations compared to low urbanization sites (direct effect:  $F_{2,602} = 7.57$ ,  $p = 6.98$   
231  $\times 10^{-3}$ , Tukey HSD test,  $p = 7.57 \times 10^{-3}$ , Fig 2). Analysis of SEM path coefficients showed

232 that the indirect effect of local scale urbanization on mesh width, through body size shifts,  
233 was also negative and equal to 49.30 % of the direct effect (this is derived from the predicted  
234 difference between low and high local urbanization populations due to size shifts  $\pm SE$  : -0.10  
235  $\pm 0.02$  mm, compared to  $-0.21 \pm 0.07$  mm for the direct effect of high urbanization, Fig 2). No  
236 such effect was present at the landscape scale ( $F_{2,602} = 1.30, p = 0.42$ ). There was significant  
237 spatial autocorrelation in web mesh widths ( $F_{12,602} = 44.77, p = 8.01 \times 10^{-8}$ ), but no effect of  
238 sampling date ( $F_{1,602} = 0.86, p = 0.29$ ).

239 Capture Thread Length was also positively correlated with body size ( $\beta \pm SE = 0.20 \pm 0.04,$   
240  $F_{1,602} = 21.02, p = 9.31 \times 10^{-8}$ ) and sampling date ( $\beta \pm SE = 0.29 \pm 0.10, F_{1,602} = 6.00, p = 4.01$   
241  $\times 10^{-3}$ ). Size being equal, CTL was significantly influenced by urbanization at the landscape  
242 scale ( $F_{2,602} = 29.04, p = 3.28 \times 10^{-9}$ ). Spiders invested less in webs in intermediate and highly  
243 urbanized populations than in low-urbanization sites (Tukey HSD tests,  $p = 1.20 \times 10^{-5}$ , Fig  
244 2). Analysis of SEM path coefficients showed that the indirect effect of landscape-scale  
245 urbanization on CTL, through body size shifts, was either close to zero or very slightly  
246 positive, depending on the urbanization intensity (predicted difference between low and  
247 moderate/high landscape-scale urbanization sites due to size shifts:  $+10.16 \pm 20.29$  and  
248  $+43.50 \pm 21.56$  cm, compared to  $+579.54 \pm 91.41$  and  $+423.33 \pm 92.16$  cm for the direct  
249 effect of urbanization, Fig 2). By contrast, local scale urbanization had no direct effect on  
250 CTL ( $F_{2,602} = 3.98, p = 0.06$ ); it had, however, an indirect negative effect through size  
251 reduction (difference between low and high urbanization sites:  $-69.84 \pm 19.92$  cm, Fig 2).  
252 CTL values were spatially correlated ( $F_{12,602} = 70.23, p = 2.86 \times 10^{-14}$ ).

253 Web surface was near perfectly predicted by CTL, mesh and their interaction; as such, its  
254 response to urbanization was similar to the response of these two traits. Web surface  
255 decreased with increasing urbanization at the local scale (Fig 2); this decrease was both due to  
256 indirect and direct responses, with the latter being more important (average differences

257 between low and high urbanization:  $-38.85 \pm 9.44$  and  $-72.47 \pm 23.15$  cm<sup>2</sup>, respectively). It  
258 increased with landscape-scale urbanization (Fig 2); as for CTL, this was mostly due to direct  
259 responses ( $+130.93 \pm 35.12$  cm<sup>2</sup> going from low to high-urbanization sites, compared to  
260  $+15.32 \pm 9.88$  cm<sup>2</sup> for the size-mediated indirect effect).

#### 261 Spider egg load

262 The number of eggs per spider was positively correlated with body size ( $\beta = 0.03 \pm 0.01$ ,  
263 Wald  $X^2 = 7.74$ ,  $df = 1$ ,  $p = 5.39 \times 10^{-3}$ ) and was not influenced by web traits, or by their  
264 interactions with urbanization (all  $p$  values  $> 0.17$ ). Urbanization influenced fecundity at the  
265 local scale ( $X^2 = 90.08$ ,  $df = 2$ ,  $p < 2.2 \times 10^{-16}$ ), but not at the landscape scale ( $X^2 = 3.03$ ,  $df =$   
266  $2$ ,  $p = 0.22$ ). Size being equal, egg load decreased as the local level of urbanization increased  
267 (Tukey HSD tests,  $p < 4.29 \times 10^{-3}$ , Fig 2). This direct effect of urbanization is predicted to  
268 lead to high-urbanization spiders having  $54.26 \pm 5.22$  fewer eggs, on average, than their low-  
269 urbanization conspecifics. We can use results from the piecewise path model to compare this  
270 decrease to the one predicted to occur indirectly due to the negative effect of local  
271 urbanization on body size, which is estimated to  $-5.23 \pm 1.82$  eggs. Egg load increased  
272 significantly with sampling date ( $\beta = 0.08 \pm 0.04$ ,  $X^2 = 4.89$ ,  $df = 1$ ,  $p = 0.03$ ); there was no  
273 clear effect of spatial structure ( $X^2 = 10.87$ ,  $df = 5$ ,  $p = 0.054$ ).

274

## 275 **Discussion**

276 Using a standardized sampling design, we found that the abundance of *Araneus diadematus*  
277 was independent of the level of urbanization at two spatial scales. This replicates, over a  
278 larger spatial extent, previous results obtained in other “winning” urban spiders, i.e. in species  
279 abundant in urban settings (Trubl *et al.* 2012; Lowe, Wilder & Hochuli 2017). The fact that *A.*  
280 *diadematus* is able to maintain consistent population densities across broad gradients of  
281 urbanization, when many species in the same spider communities cannot (Dahirel *et al.* 2017),  
282 hints at the existence of adaptations to one or several environmental changes associated with  
283 urbanization.

284 *Araneus diadematus* experienced size reduction in response to local urbanization only. In  
285 addition to smaller sizes observed early at the season, a likely consequence of shorter  
286 development times (Mayntz, Toft & Vollrath 2003), the Urban Heat Island effect is a possible  
287 cause for the observed size reduction in highly urbanized sites. The temperature-size rule,  
288 found in many arthropods, indeed predicts that, due to the temperature-dependence of  
289 metabolic rates and costs, individuals are smaller at higher temperatures (Atkinson 1994;  
290 Horne *et al.* 2015). Supporting here the hypothesis of a temperature-driven size reduction (by  
291 contrast with e.g. Entling *et al.* 2010; Lowe, Wilder & Hochuli 2014), is the fact that the  
292 urban heat island effect, like size differences, is only detectable when one considers  
293 urbanization at the local scale in the study region (Kaiser *et al.* 2016). However, resource  
294 availability during development can also strongly influence adult size in spiders (Mayntz *et*  
295 *al.* 2003; Kralj-Fišer *et al.* 2014). Higher prey abundance in urbanised spots of the Sydney  
296 area was indeed associated with increased body size in the spider *Nephila plumipes* (Lowe *et*  
297 *al.* 2014; Lowe, Wilder & Hochuli 2016). In the studied region, on the contrary, prey size and  
298 prey biomass availability decreased with urbanization, but at both spatial scales, and not  
299 simply in response to local urbanization (Dahirel *et al.* 2017). This scale discrepancy may be

300 explained by both mechanisms playing a role, their effects cumulating at the local scale.  
301 Alternatively, resource loss is the main mechanism driving size-reduction with urbanization,  
302 which is only observed at the local scale because spiders are able to alter their web-building  
303 behaviour to compensate for prey biomass loss at the landscape, but not at the local scale. The  
304 fact that egg load only decreased in response to local-scale, but not landscape-level  
305 urbanization, lends credence to this compensation hypothesis.

306 Depending on the scale considered, spiders either built webs with smaller mesh width or  
307 increased their silk investment in response to urbanization. Webs with smaller mesh are  
308 considered better at stopping and retaining prey (Blackledge & Zevenbergen 2006), including  
309 large, potentially life-saving prey (Venner & Casas 2005), at the cost of a smaller web surface  
310 and therefore fewer prey intercepted. When mesh width is held constant, as it is in response to  
311 landscape-level urbanization, increased silk investment/ CTL leads to an increase in web  
312 surface (Figs 1, 2) and therefore an increase in the number of prey caught (Prokop &  
313 Grygláková 2005; Venner & Casas 2005). Given the reduction in prey size and biomass with  
314 urbanization at both scales (Dahirel *et al.* 2017), both types of changes can be seen as  
315 adaptive responses to urbanization, which potentially contribute to the persistence of *Araneus*  
316 *diadematus* across urbanization gradients. Our path analysis approach indicates that both  
317 direct and size-dependent effects influence these web changes along urbanization gradients at  
318 both spatial scales. Web-building in orb-weaving spiders has previously been shown to be  
319 both size-constrained (Bonte *et al.* 2008; Gregorič *et al.* 2015), but also highly variable  
320 depending on the environment (Herberstein & Tso 2011); the net effect in the case of  
321 environmental changes influencing body size was so far unknown. Our results show that the  
322 effects of size constraints on web-building are of limited importance compared to direct  
323 responses to urbanization. At the landscape scale, size does not appear to substantially limit  
324 the possibilities of spiders to alter their web-building behaviour in response to urbanization



325 (Figs. 1 and 2). At the local scale, shifts in mesh due to urban size reduction were limited  
326 compared to direct responses (at most ~50% of direct responses and ~a third of the total  
327 response, Figs 1 and 2) and were in the same direction (smaller mesh width). On the other  
328 hand, CTL did not respond directly to local urbanization, meaning that only size-dependent  
329 decreases had an influence at this scale (Figs 1, 2); reductions in web surface with local  
330 urbanization were therefore stronger than expected simply based on mesh width reduction and  
331 the mesh width/web surface trade-off.

332 Changes in web-building behaviour in relation to urbanization may both originate from  
333 plasticity and/or evolutionary changes (Herberstein & Tso 2011). Disentangling the relative  
334 contribution of both is however difficult in observational studies (Merilä & Hendry 2014). We  
335 here take advantage of our two-spatial scales design, and the fact that plasticity and genetic  
336 adaptation are generally expected to appear in response to finer-grained and coarser-grained  
337 environmental variation, respectively (Richardson *et al.* 2014), to emit hypotheses on the  
338 relative contributions of these two mechanisms. Mesh width varies with urbanization at the  
339 local but not at the landscape scale, which would indicate a more important role of plastic  
340 responses. By contrast, CTL only increased significantly in response to landscape-scale  
341 urbanization. This is despite prey characteristics responding similarly to urbanization at both  
342 the local and landscape scales (Dahirel *et al.* 2017). Temperature can also have a positive  
343 effect on silk production (Vollrath *et al.* 1997). However, the urban heat island effect is more  
344 important at the local, rather than landscape scale in our study region (Kaiser *et al.* 2016), and  
345 is moreover too weak (about 1-2°C) to explain the observed increase in CTL (as even a 12°C  
346 increase results in smaller CTL increases than those we observed; Vollrath *et al.* 1997). Thus,  
347 while other drivers may have been overlooked, the absence of local responses suggests a  
348 predominance of genetic adaptation in silk production changes in response to urbanization.

349 Costs associated with urban life were especially prominent at the local scale. Indeed, at this  
350 scale, web capture surfaces were smaller than expected based on mesh/surface trade-offs, due  
351 to size constraints, and lower fecundity was observed despite stable population densities (Fig.  
352 2). Food limitation has strong negative impacts on spider lifetime fecundity even in the  
353 absence of survival costs (Kleinteich, Wilder & Schneider 2015); the lower fecundities  
354 observed in locally urbanized sites may indicate that spiders were, at this scale, unable to fully  
355 compensate for reduced prey biomass despite shifts in web-building, and smaller size leading  
356 to reduced requirements. From a more applied perspective, these results confirm the oft-stated  
357 importance of maintaining local greenspots in highly urbanized landscapes (e.g. Philpott *et al.*  
358 2013), as even generalist “winning” species such as *A. diadematus* may benefit from them.  
359 Spiders were comparatively much better at dealing with landscape-scale urbanization; indeed,  
360 both fecundity and population densities remained unaffected by urbanization at this scale.  
361 This may indicate that traits that successfully varied at this scale (namely CTL and by  
362 extension web surface) are more important to prey capture success than the others (mesh  
363 width). Conversely, costs associated with increased silk production may be detectable in other  
364 life-history dimensions than the ones we explored in the present study (e.g. survival).  
365 Comparisons among “winning species” that differ in their silk production strategy (e.g. *A.*  
366 *diadematus*, which destroys and recreates webs regularly, versus *Nephila plumipes*, which  
367 build semi-permanent webs, Lowe *et al.* 2014), may help shed further light on the costs/  
368 benefits balance of adaptation to urban life.

### 369 **Authors’ contributions**

370 DB conceived the study and designed methodology; MDC and PV collected the data; MD and  
371 MDC analysed the data; MD led the writing of the manuscript. All authors contributed  
372 critically to the draft and gave final approval for publication.

373 **Acknowledgments**

374 We are grateful to Jasper Dierick for his assistance during field sampling, and to Jonathan  
375 Lefcheck for his advice on *piecewiseSEM*. Hans Matheve performed GIS calculations and site  
376 selection. This article is part of the Belspo-funded IAP project P7/04 SPEEDY (SPatial and  
377 environmental determinants of Eco-Evolutionary DYnamics: anthropogenic environments as  
378 a model). MD is funded by a postdoctoral grant from the Fyssen Foundation.

379 **Data accessibility**

380 Data will be made available on Dryad upon final article acceptance.

381 **References**

- 382 Alberti, M. (2015) Eco-evolutionary dynamics in an urbanizing planet. *Trends in Ecology &*  
383 *Evolution*, **30**, 114–126.
- 384 Alberti, M., Correa, C., Marzluff, J.M., Hendry, A.P., Palkovacs, E.P., Gotanda, K.M., Hunt,  
385 V.M., Apgar, T.M. & Zhou, Y. (2017a) Global urban signatures of phenotypic change  
386 in animal and plant populations. *Proceedings of the National Academy of Sciences*,  
387 201606034.
- 388 Alberti, M., Marzluff, J. & Hunt, V.M. (2017b) Urban driven phenotypic changes: empirical  
389 observations and theoretical implications for eco-evolutionary feedback. *Philosophical*  
390 *Transactions of the Royal Society B: Biological Sciences*, **372**, 20160029.
- 391 Atkinson, D. (1994) Temperature and organism size—a biological law for ectotherms?  
392 *Advances in Ecological Research*, **25**, 1–58.
- 393 Blackledge, T.A. & Zevenbergen, J.M. (2006) Mesh width influences prey retention in spider  
394 orb webs. *Ethology*, **112**, 1194–1201.

- 395 Bonte, D., Lanckacker, K., Wiersma, E. & Lens, L. (2008) Web building flexibility of an orb-  
396 web spider in a heterogeneous agricultural landscape. *Ecography*, **31**, 646–653.
- 397 Bonte, D., Van Dyck, H., Bullock, J.M., Coulon, A., Delgado, M., Gibbs, M., Lehouck, V.,  
398 Matthysen, E., Mustin, K., Saastamoinen, M., Schtickzelle, N., Stevens, V.M.,  
399 Vandewoestijne, S., Baguette, M., Barton, K., Benton, T.G., Chaput-Bardy, A.,  
400 Clobert, J., Dytham, C., Hovestadt, T., Meier, C.M., Palmer, S.C.F., Turlure, C. &  
401 Travis, J.M.J. (2012) Costs of dispersal. *Biological Reviews*, **87**, 290–312.
- 402 Borcard, D., Gillet, F. & Legendre, P. (2011) *Numerical Ecology with R*. Springer-Verlag  
403 New York Inc., New York, USA.
- 404 Brans, K.I., Govaert, L., Engelen, J.M.T., Gianuca, A.T., Souffreau, C. & Meester, L.D.  
405 (2017a) Eco-evolutionary dynamics in urbanized landscapes: evolution, species  
406 sorting and the change in zooplankton body size along urbanization gradients.  
407 *Philosophical Transactions of the Royal Society of London B*, **372**, 20160030.
- 408 Brans, K.I., Jansen, M., Vanoverbeke, J., Tüzün, N., Stoks, R. & De Meester, L. (2017b) The  
409 heat is on: Genetic adaptation to urbanization mediated by thermal tolerance and body  
410 size. *Global Change Biology*, n/a-n/a.
- 411 Breed, A.L., Levine, V.D., Peakall, D.B. & Witt, P.N. (1964) The fate of the intact orb web of  
412 the spider *Araneus diadematus*. *Behaviour*, **232**, 43–60.
- 413 Dahirel, M., Dierick, J., De Cock, M. & Bonte, D. (2017) Intraspecific variation shapes  
414 community-level behavioral responses to urbanization in spiders. *Ecology*, **98**, 2379–  
415 2390.

- 416 Debecker, S., Sanmartín-Villar, I., de Guinea-Luengo, M., Cordero-Rivera, A. & Stoks, R.  
417 (2016) Integrating the pace-of-life syndrome across species, sexes and individuals:  
418 covariation of life history and personality under pesticide exposure. *Journal of Animal*  
419 *Ecology*, **85**, 726–738.
- 420 Eberhard, W.G. (2013) The rare large prey hypothesis for orb web evolution: a critique.  
421 *Journal of Arachnology*, **41**, 76–80.
- 422 Entling, W., Schmidt-Entling, M.H., Bacher, S., Brandl, R. & Nentwig, W. (2010) Body size–  
423 climate relationships of European spiders. *Journal of Biogeography*, **37**, 477–485.
- 424 Foelix, R. (2010) *Biology of Spiders*, 3rd ed. Oxford University Press, Oxford, UK.
- 425 Grace, J.B., Schoolmaster, D.R., Guntenspergen, G.R., Little, A.M., Mitchell, B.R., Miller,  
426 K.M. & Schweiger, E.W. (2012) Guidelines for a graph-theoretic implementation of  
427 structural equation modeling. *Ecosphere*, **3**, 1–44.
- 428 Gregorič, M., Kuntner, M. & Blackledge, T.A. (2015) Does body size predict foraging effort?  
429 Patterns of material investment in spider orb webs. *Journal of Zoology*, **296**, 67–78.
- 430 Hendry, A.P., Gotanda, K.M. & Svensson, E.I. (2017) Human influences on evolution, and  
431 the ecological and societal consequences. *Philosophical Transactions of the Royal*  
432 *Society B: Biological Sciences*, **372**, 20160028.
- 433 Herberstein, M.E. & Tso, I.-M. (2000) Evaluation of formulae to estimate the capture area  
434 and mesh height of orb webs (Araneoidea, Araneae). *Journal of Arachnology*, **28**,  
435 180–184.

- 436 Herberstein, M.E. & Tso, I.-M. (2011) Spider webs: evolution, diversity and plasticity. *Spider*  
437 *Behaviour: Flexibility and Versatility* (ed M.E. Herberstein), pp. 57–98. Cambridge  
438 University Press, Cambridge, UK.
- 439 Horne, C.R., Hirst, A.G. & Atkinson, D. (2015) Temperature-size responses match  
440 latitudinal-size clines in arthropods, revealing critical differences between aquatic and  
441 terrestrial species. *Ecology Letters*, **18**, 327–335.
- 442 Johnson, M.T.J. & Munshi-South, J. (2017) Evolution of life in urban environments. *Science*,  
443 **358**, eaam8327.
- 444 Kaiser, A., Merckx, T. & Van Dyck, H. (2016) The Urban Heat Island and its spatial scale  
445 dependent impact on survival and development in butterflies of different thermal  
446 sensitivity. *Ecology and Evolution*, **6**, 4129–4140.
- 447 Kleinteich, A., Wilder, S.M. & Schneider, J.M. (2015) Contributions of juvenile and adult  
448 diet to the lifetime reproductive success and lifespan of a spider. *Oikos*, **124**, 130–138.
- 449 Kralj-Fišer, S., Čelik, T., Lokovšek, T., Šuen, K., Šiling, R. & Kuntner, M. (2014)  
450 Development and growth in synanthropic species: plasticity and constraints.  
451 *Naturwissenschaften*, **101**, 565–575.
- 452 Lee, P. & Thomas, T. (2002) *Araneus diadematus*. *Provisional atlas of British spiders*  
453 *(Arachnida, Araneae)*, volumes 1 and 2 (eds P.R. Harvey, D.R. Nellist & M.G.  
454 Telfer), p. 225. Biological Records Centre, Huntingdon, UK.
- 455 Lefcheck, J.S. (2016) piecewiseSEM: Piecewise structural equation modelling in R for  
456 ecology, evolution, and systematics. *Methods in Ecology and Evolution*, **7**, 573–579.

- 457 Legendre, P. & Legendre, L.F.J. (2012) *Numerical Ecology*, 3rd ed. Elsevier, Amsterdam,  
458 NL.
- 459 Lowe, E.C., Wilder, S.M. & Hochuli, D.F. (2014) Urbanisation at multiple scales is  
460 associated with larger size and higher fecundity of an orb-weaving spider. *PLoS ONE*,  
461 **9**, e105480.
- 462 Lowe, E.C., Wilder, S.M. & Hochuli, D.F. (2016) Persistence and survival of the spider  
463 *Nephila plumipes* in cities: do increased prey resources drive the success of an urban  
464 exploiter? *Urban Ecosystems*, **19**, 705–720.
- 465 Lowe, E.C., Wilder, S.M. & Hochuli, D.F. (2017) Life history of an urban-tolerant spider  
466 shows resilience to anthropogenic habitat disturbance. *Journal of Urban Ecology*, **3**.
- 467 Lowry, H., Lill, A. & Wong, B.B.M. (2013) Behavioural responses of wildlife to urban  
468 environments. *Biological Reviews*, **88**, 537–549.
- 469 Mayntz, D., Toft, S. & Vollrath, F. (2003) Effects of prey quality and availability on the life  
470 history of a trap-building predator. *Oikos*, **101**, 631–638.
- 471 McDonnell, M.J. & Hahs, A.K. (2015) Adaptation and adaptedness of organisms to urban  
472 environments. *Annual Review of Ecology, Evolution, and Systematics*, **46**, 261–280.
- 473 Merilä, J. & Hendry, A.P. (2014) Climate change, adaptation, and phenotypic plasticity: the  
474 problem and the evidence. *Evolutionary Applications*, **7**, 1–14.
- 475 Nentwig, W., Blick, T., Gloor, D., Hänggi, A. & Kropf, C. (2016) Spiders of Europe. URL  
476 <http://www.araneae.unibe.ch> [accessed 17 November 2016]

- 477 Oliveira, M.O., Freitas, B.M., Scheper, J. & Kleijn, D. (2016) Size and sex-dependent  
478 shrinkage of Dutch bees during one-and-a-half centuries of land-use change. *PLOS*  
479 *ONE*, **11**, e0148983.
- 480 Parris, K.M. (2016) *Ecology of Urban Environments*. Wiley-Blackwell, Chichester, UK.
- 481 Philpott, S.M., Cotton, J., Bichier, P., Friedrich, R.L., Moorhead, L.C., Uno, S. & Valdez, M.  
482 (2013) Local and landscape drivers of arthropod abundance, richness, and trophic  
483 composition in urban habitats. *Urban Ecosystems*, **17**, 513–532.
- 484 Piano, E., De Wolf, K., Bona, F., Bonte, D., Bowler, D.E., Isaia, M., Lens, L., Merckx, T.,  
485 Mertens, D., van Kerckvoorde, M., De Meester, L. & Hendrickx, F. (2017)  
486 Urbanization drives community shifts towards thermophilic and dispersive species at  
487 local and landscape scales. *Global Change Biology*, **23**, 2554–2564.
- 488 Prokop, P. & Grygláková, D. (2005) Factors affecting the foraging success of the wasp-like  
489 spider *Argiope bruennichi* (Araneae): role of web design. *Biologia*, **60**, 165–169.
- 490 R Core Team. (2016) *R: A Language and Environment for Statistical Computing*. R  
491 Foundation for Statistical Computing, Vienna, Austria.
- 492 Renauld, M., Hutchinson, A., Loeb, G., Poveda, K. & Connelly, H. (2016) Landscape  
493 simplification constrains adult size in a native ground-nesting bee. *PLOS ONE*, **11**,  
494 e0150946.
- 495 Richardson, J.L., Urban, M.C., Bolnick, D.I. & Skelly, D.K. (2014) Microgeographic  
496 adaptation and the spatial scale of evolution. *Trends in Ecology & Evolution*, **29**, 165–  
497 176.



- 498 Roberts, M. (1993) *The Spiders of Great Britain and Ireland*. Apollo Books, Stenstrup,  
499 Denmark.
- 500 Schneider, J.M. & Vollrath, F. (1998) The effect of prey type on the geometry of the capture  
501 web of *Araneus diadematus*. *Naturwissenschaften*, **85**, 391–394.
- 502 Seto, K.C., Güneralp, B. & Hutyra, L.R. (2012) Global forecasts of urban expansion to 2030  
503 and direct impacts on biodiversity and carbon pools. *Proceedings of the National*  
504 *Academy of Sciences*, **109**, 16083–16088.
- 505 Sheridan, J.A. & Bickford, D. (2011) Shrinking body size as an ecological response to climate  
506 change. *Nature Climate Change*, **1**, 401–406.
- 507 Sherman, P.M. (1994) The orb-web: an energetic and behavioural estimator of a spider's  
508 dynamic foraging and reproductive strategies. *Animal Behaviour*, **48**, 19–34.
- 509 Shipley, B. (2000) A new inferential test for path models based on directed acyclic graphs.  
510 *Structural Equation Modeling: A Multidisciplinary Journal*, **7**, 206–218.
- 511 Shipley, B. (2009) Confirmatory path analysis in a generalized multilevel context. *Ecology*,  
512 **90**, 363–368.
- 513 Shipley, B. (2013) The AIC model selection method applied to path analytic models  
514 compared using a d-separation test. *Ecology*, **94**, 560–564.
- 515 Stevens, V.M., Whitmee, S., Le Galliard, J.-F., Clobert, J., Böhning-Gaese, K., Bonte, D.,  
516 Brändle, M., Matthias Dehling, D., Hof, C., Trochet, A. & Baguette, M. (2014) A  
517 comparative analysis of dispersal syndromes in terrestrial and semi-terrestrial animals.  
518 *Ecology Letters*, **17**, 1039–1052.

- 519 Trubl, P., Gburek, T., Miles, L. & Johnson, J.C. (2012) Black widow spiders in an urban  
520 desert: Population variation in an arthropod pest across metropolitan Phoenix, AZ.  
521 *Urban Ecosystems*, **15**, 599–609.
- 522 United Nations Population Division. (2015) *World Urbanization Prospects: The 2014*  
523 *Revision*. United Nations, Department of Economic and Social Affairs, New York,  
524 USA.
- 525 Van Keer, K., Vanuytven, H., De Koninck, H. & Van Keer, J. (2010) More than one third of  
526 the Belgian spider fauna (Araneae) found within the city of Antwerp: faunistics and  
527 some reflections on urban ecology. *Nieuwsbr. Belg. Arachnol. Ver.*, **25**, 160.
- 528 Venner, S. & Casas, J. (2005) Spider webs designed for rare but life-saving catches.  
529 *Proceedings of the Royal Society of London B: Biological Sciences*, **272**, 1587–1592.
- 530 Venner, S., Thevenard, L., Pasquet, A. & Leborgne, R. (2001) Estimation of the web's  
531 capture thread length in orb-weaving spiders: determining the most efficient formula.  
532 *Annals of the Entomological Society of America*, **94**, 490–496.
- 533 Vollrath, F., Downes, M. & Krackow, S. (1997) Design Variability in Web Geometry of an  
534 Orb-Weaving Spider. *Physiology & Behavior*, **62**, 735–743.
- 535 Vriens, L., Bosch, H., De Knijf, S., De Saeger, S., Guelinckx, R., Oosterlynck, P., Van Hove,  
536 M. & Paelinckx, D. (2011) *De Biologische Waarderingskaart - Biotopen En Hun*  
537 *Verspreiding in Vlaanderen En Het Brussels Hoofdstedelijk Gewest [En: The*  
538 *Biological Valuation Map - Habitats and Their Distribution in Flanders and the*  
539 *Brussels Capital Region]*. Mededelingen van het Instituut voor Natuur- en  
540 Bosonderzoek, Brussels, Belgium.

541 Wong, B.B.M. & Candolin, U. (2015) Behavioral responses to changing environments.

542 *Behavioral Ecology*, **26**, 665–673.

543

544

545 **TABLES**

546 Table 1. Goodness-fit statistics for the four candidate models explaining web characteristics  
547 as a function of urbanization levels.

| Model             | Fisher's C   | df        | p           | AIC           | $\Delta$ AIC |
|-------------------|--------------|-----------|-------------|---------------|--------------|
| <b>Full model</b> | <b>27.97</b> | <b>18</b> | <b>0.06</b> | <b>155.97</b> | <b>0</b>     |
| Indirect model    | 69.53        | 34        | <0.001      | 181.53        | 25.56        |
| Direct model      | 97.13        | 26        | <0.001      | 230.2         | 74.23        |
| Null model        | 138.69       | 42        | <0.001      | 242.69        | 86.72        |

548

549

550 **FIGURE LEGENDS**

551 **Figure 1.** a/ Conceptual diagrams for the four candidate path models. U: urbanization (both  
552 scales); Si: body size; C: CTL; M: Mesh width; CM: CTL  $\times$  Mesh width interaction; Su: web  
553 surface. b/ Detail of the full, best-supported, model. Standardized path coefficients are  
554 presented for significant effects after ANOVAs and post-hoc tests (\*:  $p < 0.05$ ; \*\*:  $p < 0.01$ ;  
555 \*\*\*:  $p < 0.001$ ; non-significant paths in grey). Effects of space (dbMEMs) and sampling date  
556 on body size, CTL and mesh width are omitted from graphs for clarity, but accounted for in  
557 the presented  $R^2$ .

558 **Figure 2.** Predicted mean *Araneus diadematus* trait values ( $\pm$  95% confidence intervals) as a  
559 function of urbanization intensity at two spatial scales, based on the full piecewise structural  
560 equation model. Filled circles refer to values predicted when allowing both direct and indirect  
561 effects of urbanization; open circles to values obtained when only body size is allowed to  
562 respond to urbanization; dotted lines to the observed average. Predictions at one spatial scale  
563 are made by averaging over the effects of urbanization at the other spatial scale, sampling date  
564 and spatial structure.

565

566

a/

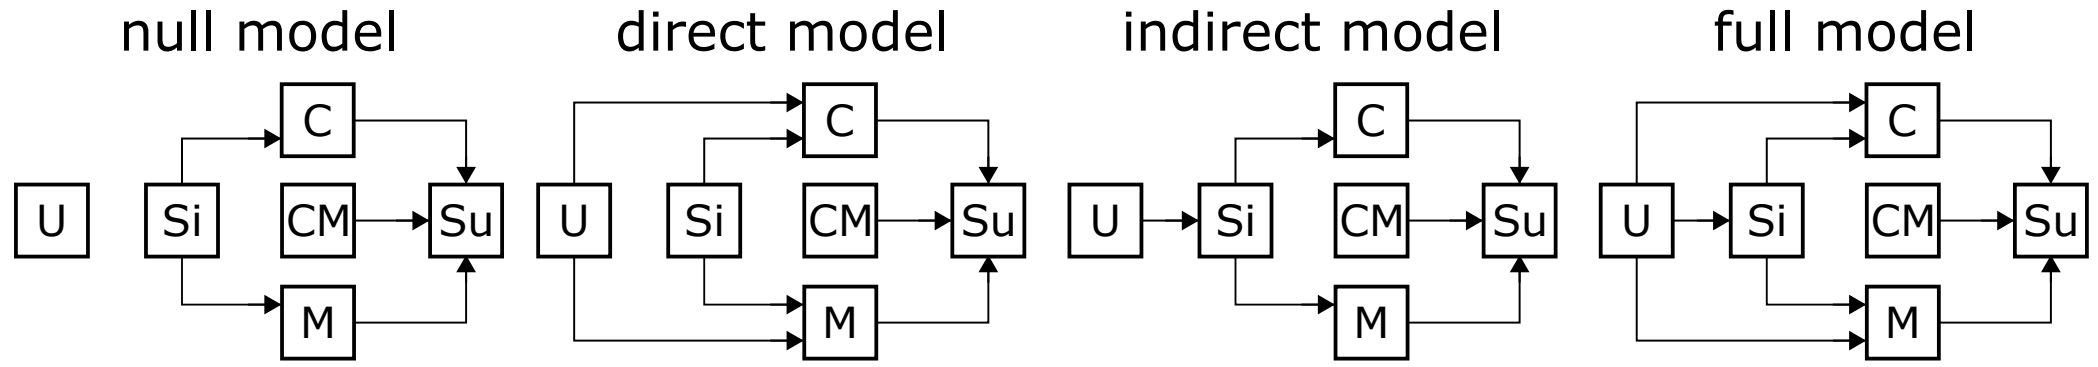

b/

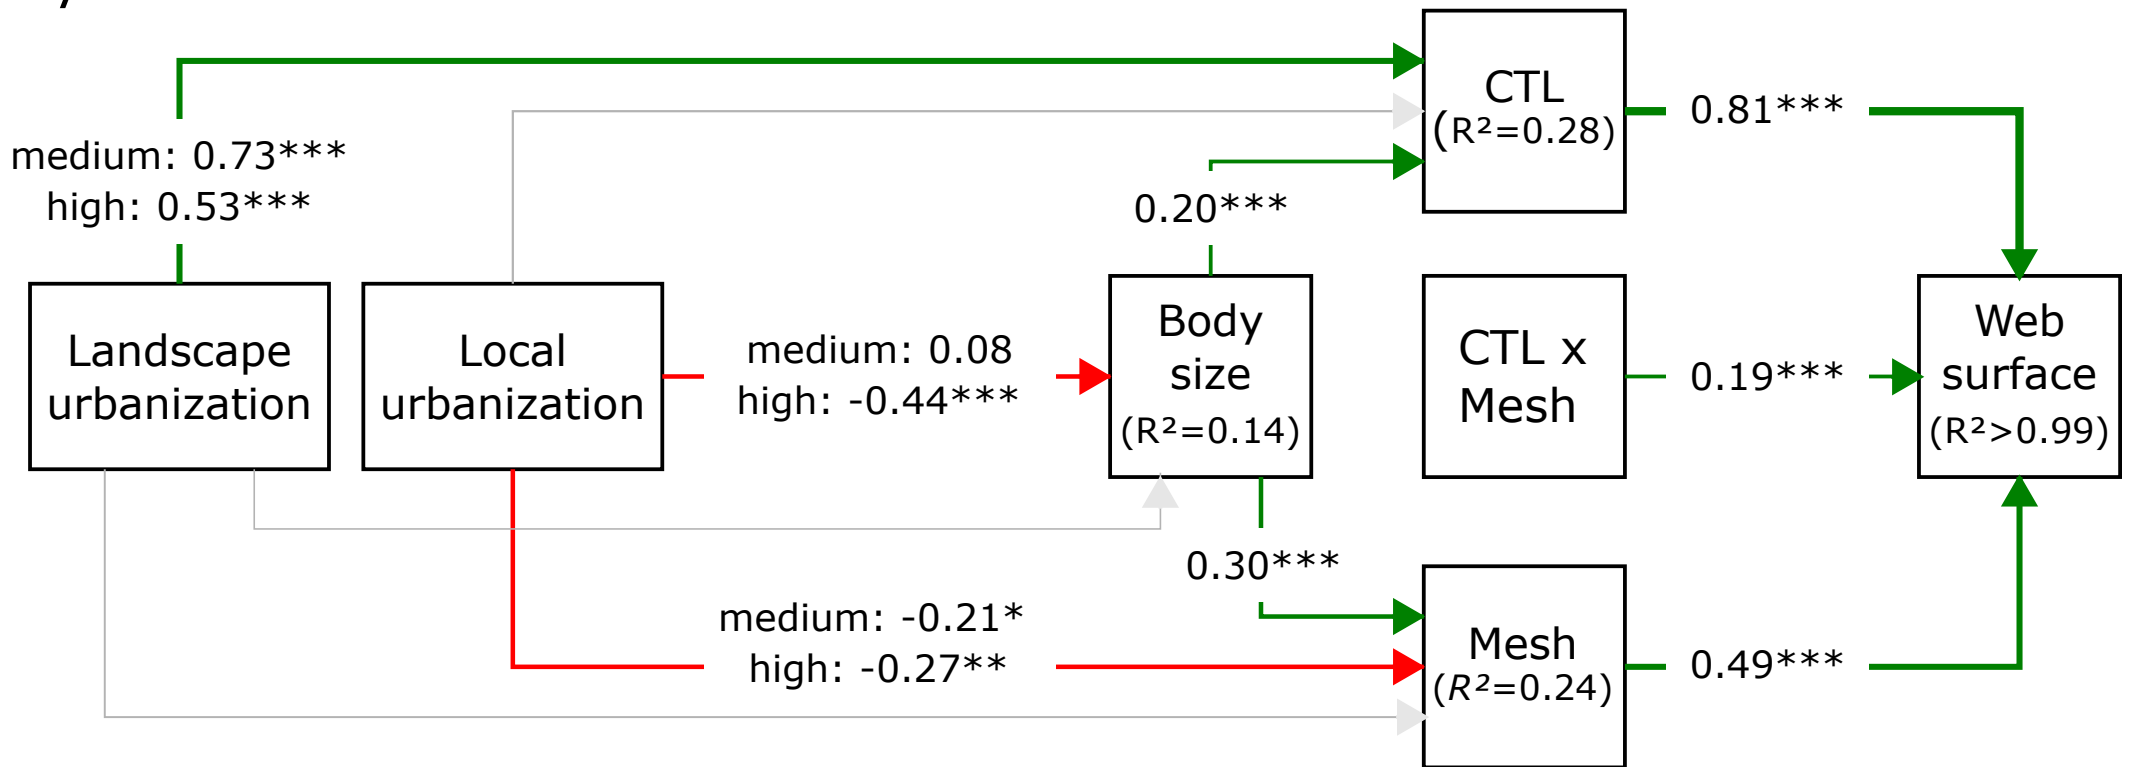

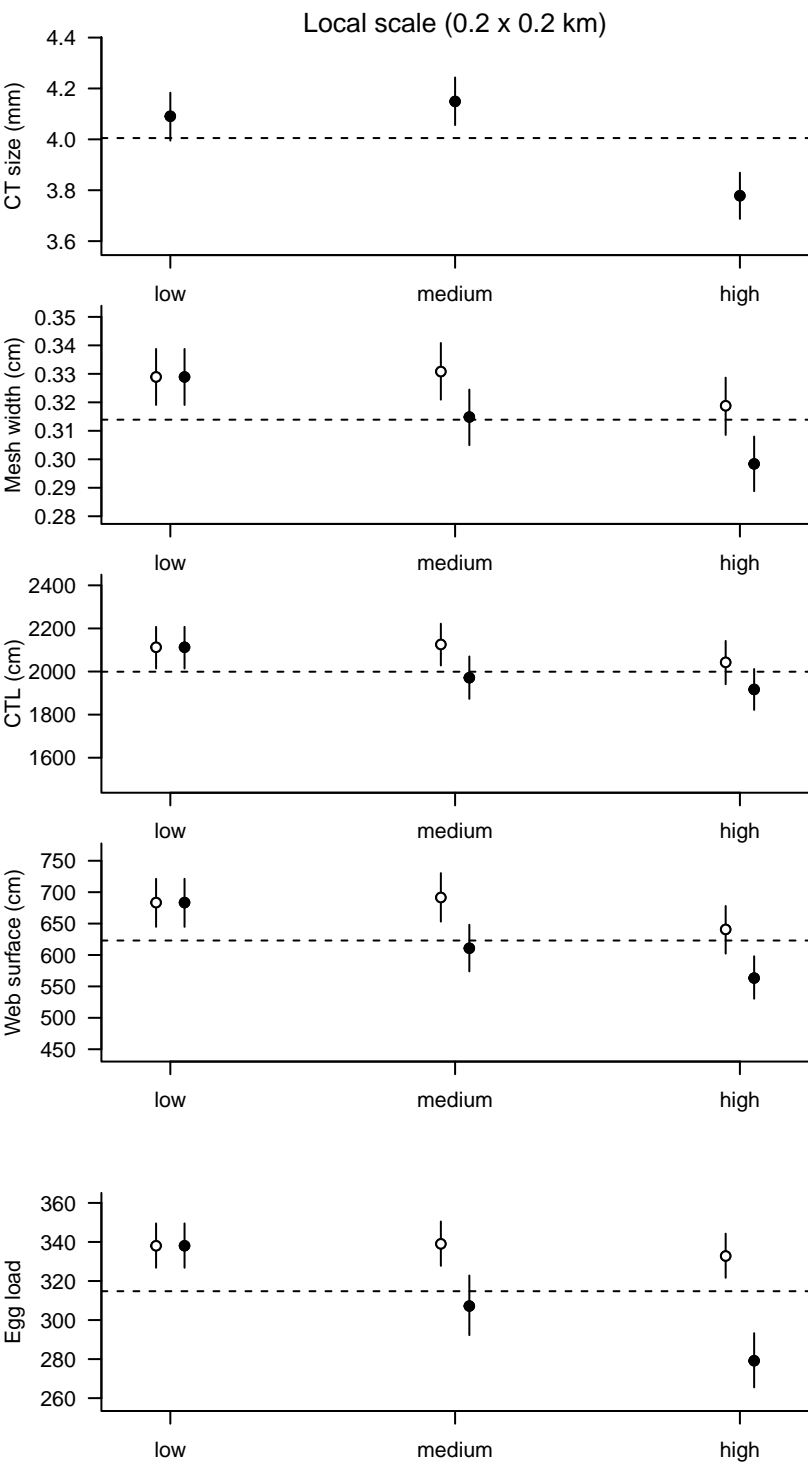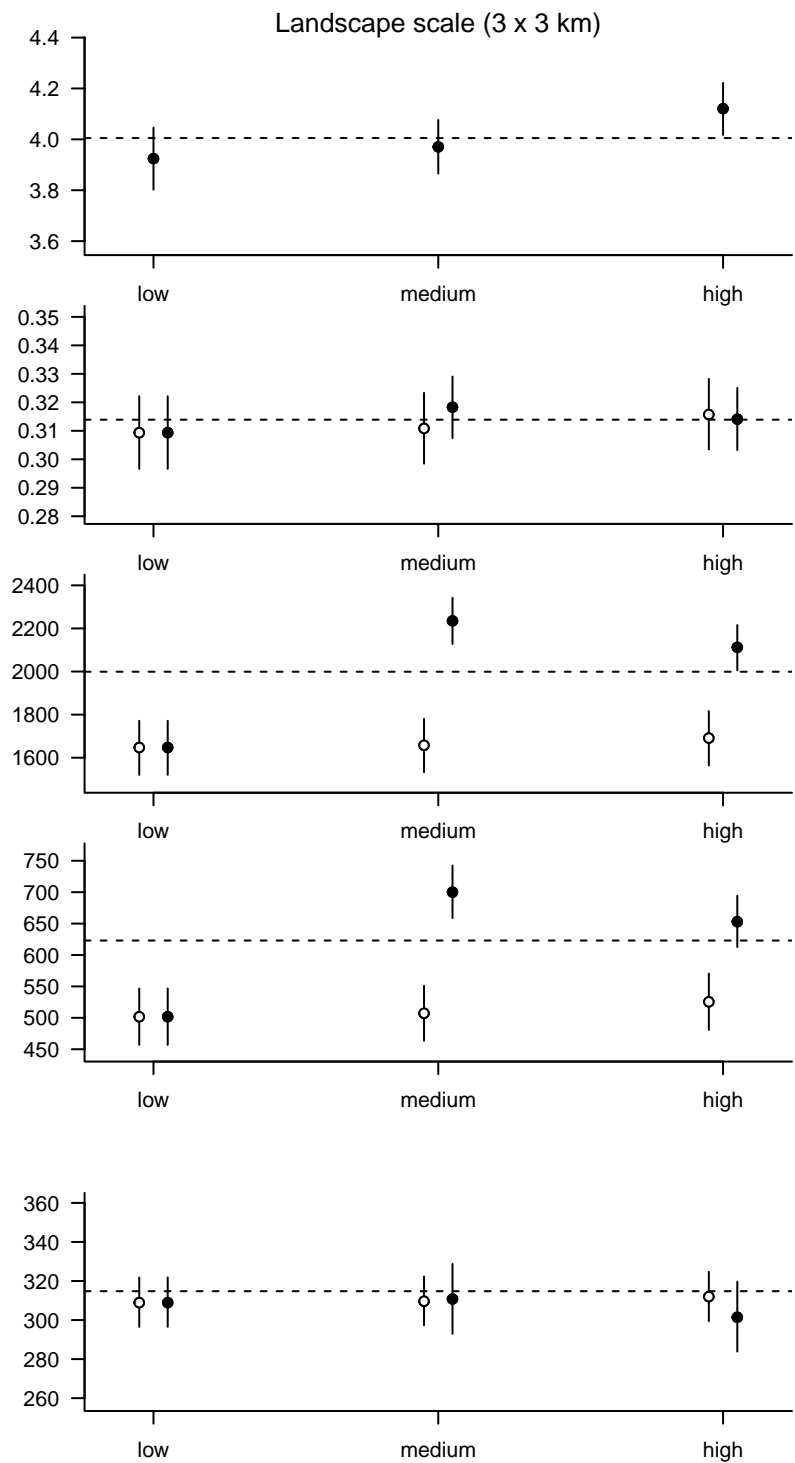

Urbanisation level
